# Supplementary material for: Modeling of African population history using f-statistics is biased when applying all previously proposed SNP ascertainment schemes
Source: PubMed Central journal article supplement (PMC10508636; doi:10.1371/journal.pgen.1010931), 2023-09-07
Supplement: pgen.1010931.s001.pdf [file pgen.1010931.s001.pdf]

Denisovan, Khomani San, Mbuti, Dinka, Mursi; admixture graph LL, 5,000 graphs

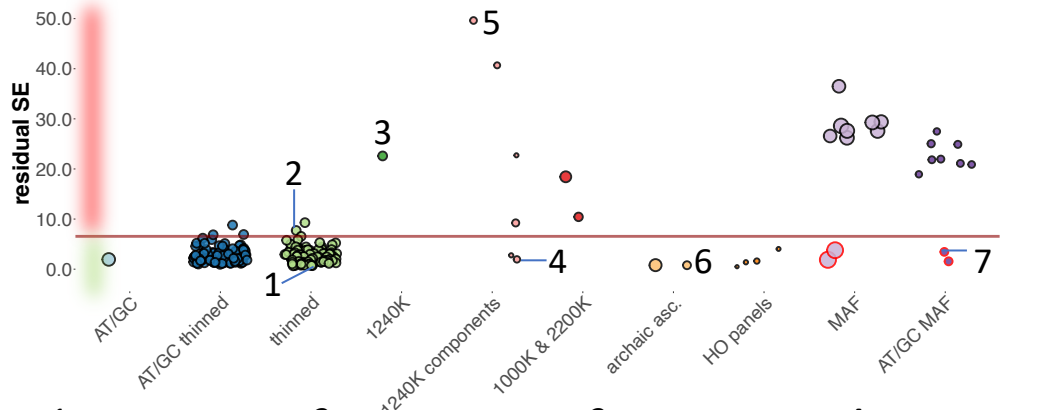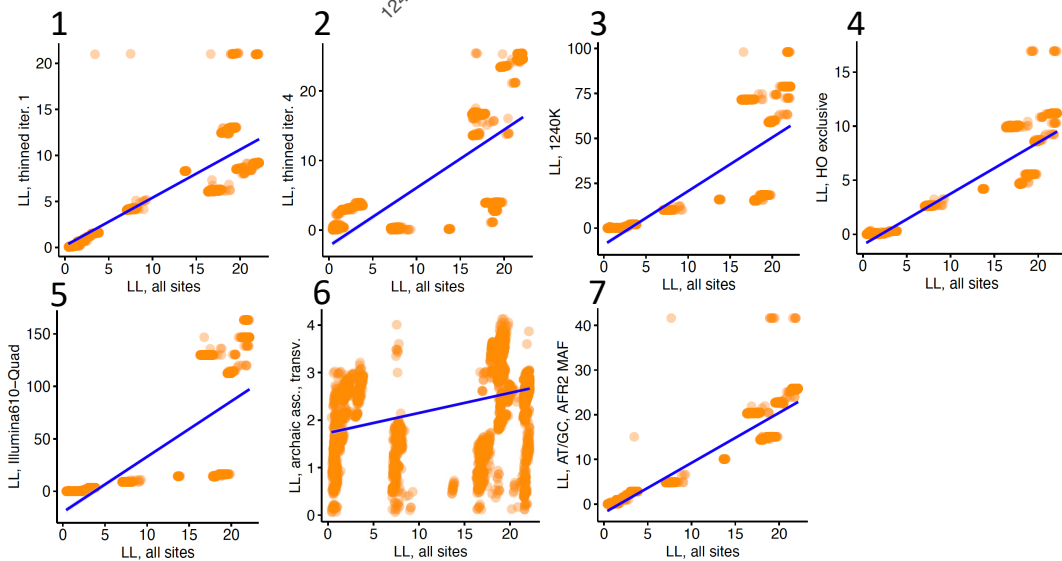

admixture graph LL, 5,000 graphs

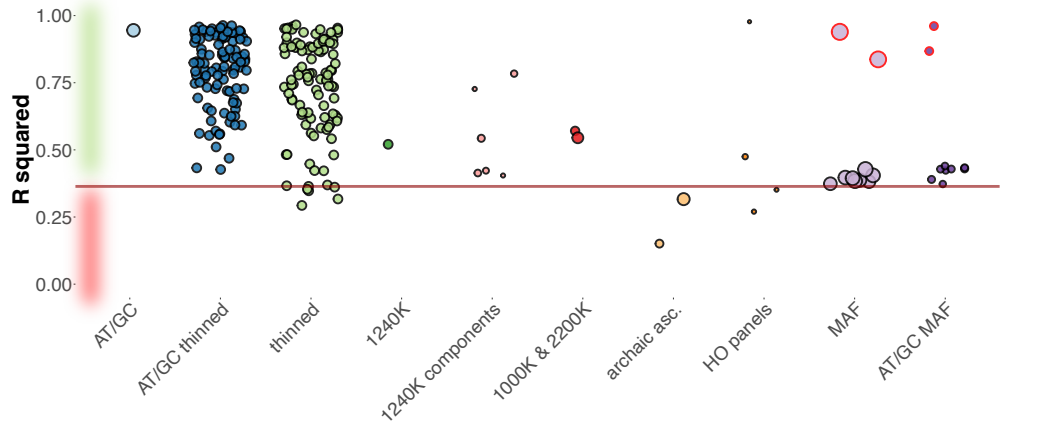

admixture graph WR, 5,000 graphs

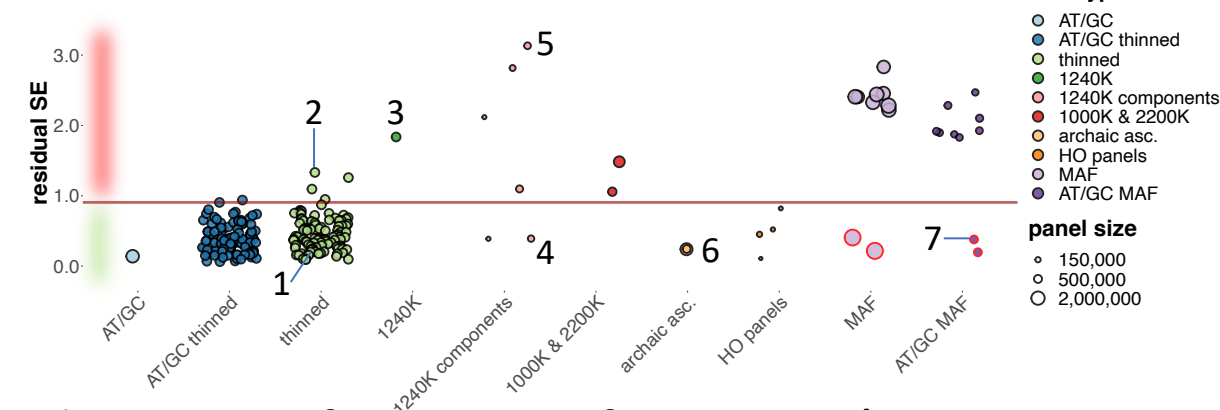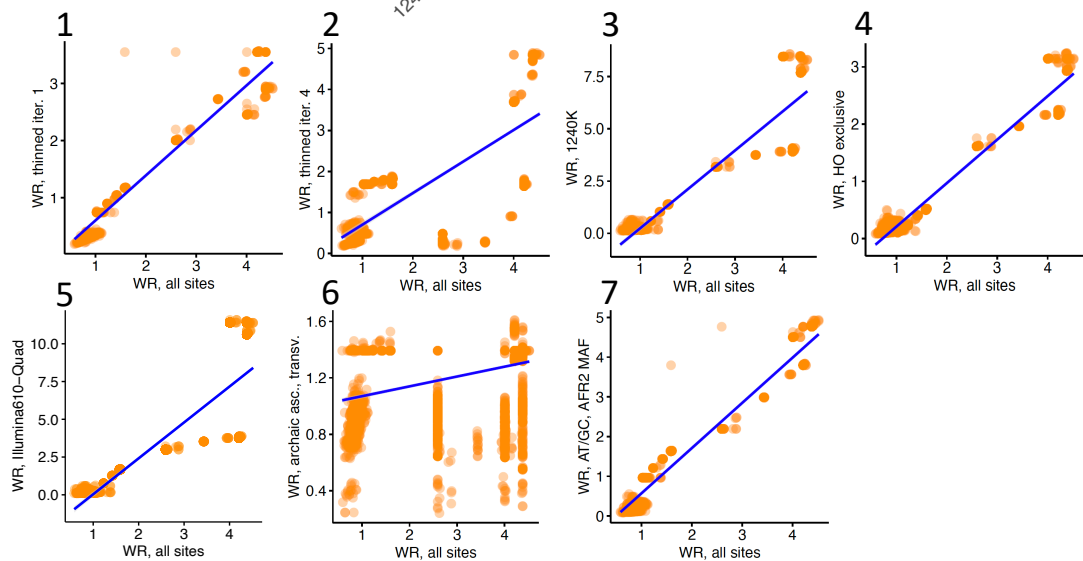

admixture graph WR, 5,000 graphs

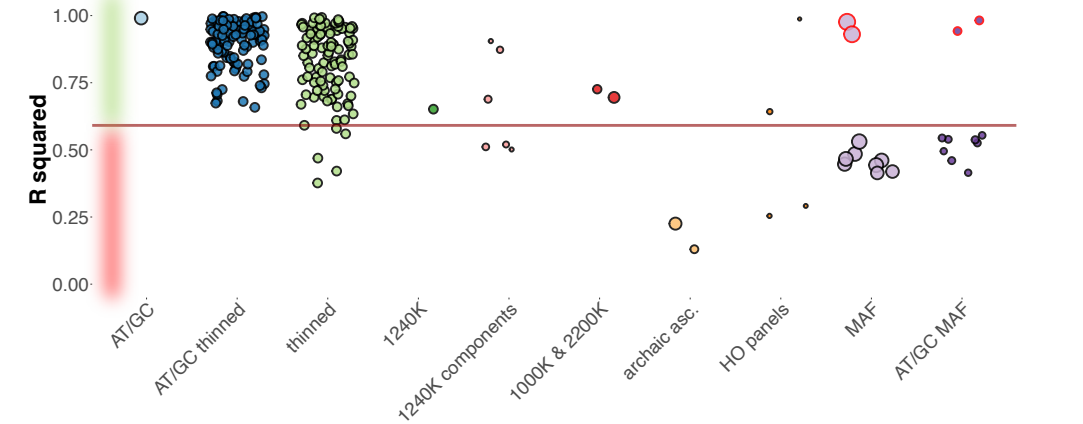

asc. type

- AT/GC
- AT/GC thinned
- thinned
- 1240K
- 1240K components
- 1000K & 2200K
- archaic asc.
- HO panels
- MAF
- AT/GC MAF

panel size

- 150,000
- 500,000
- 2,000,000
