# Supplementary material for: Modeling of African population history using f-statistics is biased when applying all previously proposed SNP ascertainment schemes
Source: PubMed Central journal article supplement (PMC10508636; doi:10.1371/journal.pgen.1010931), 2023-09-07

**a**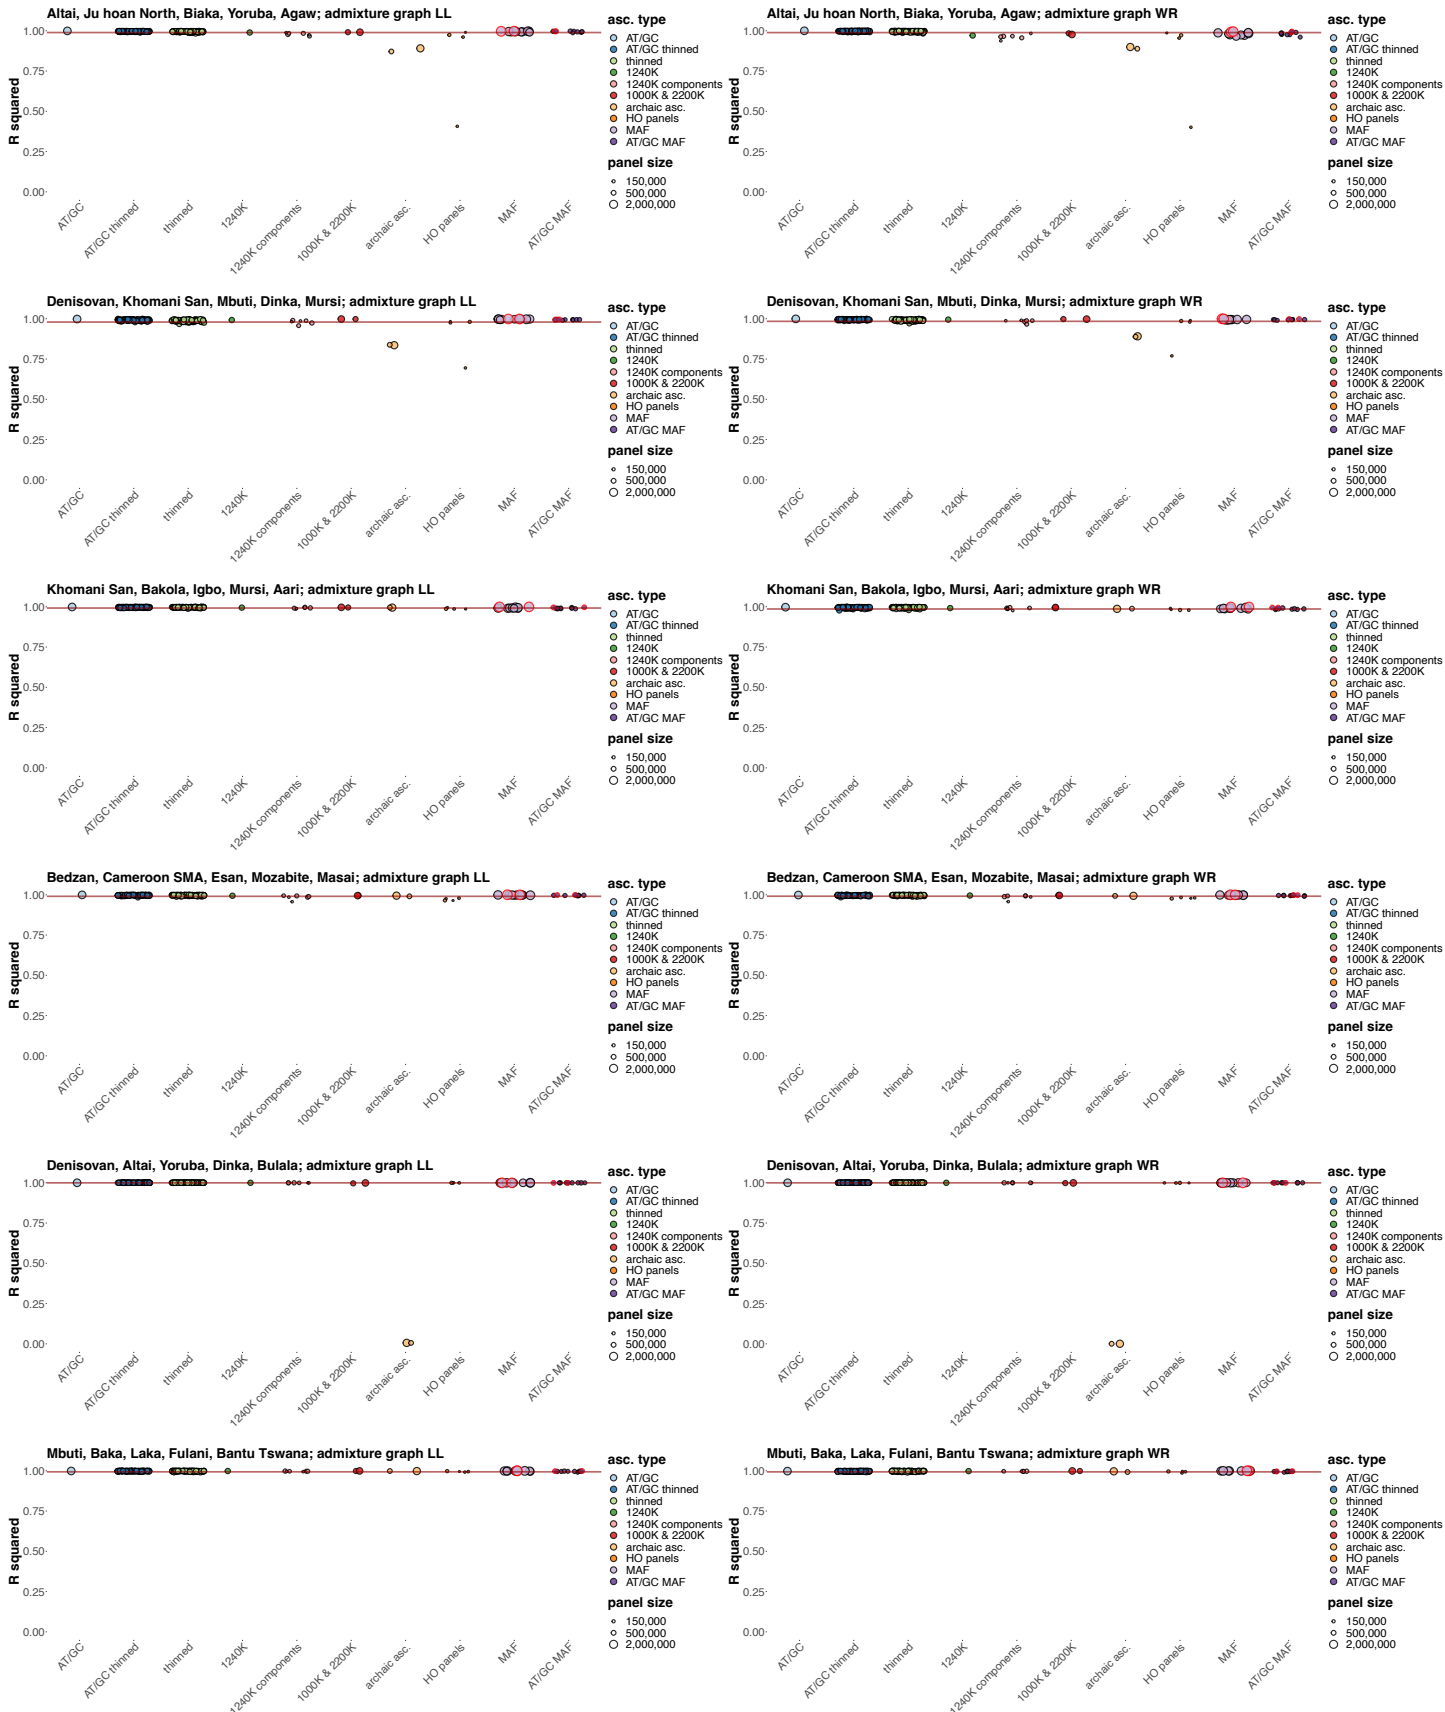

**b**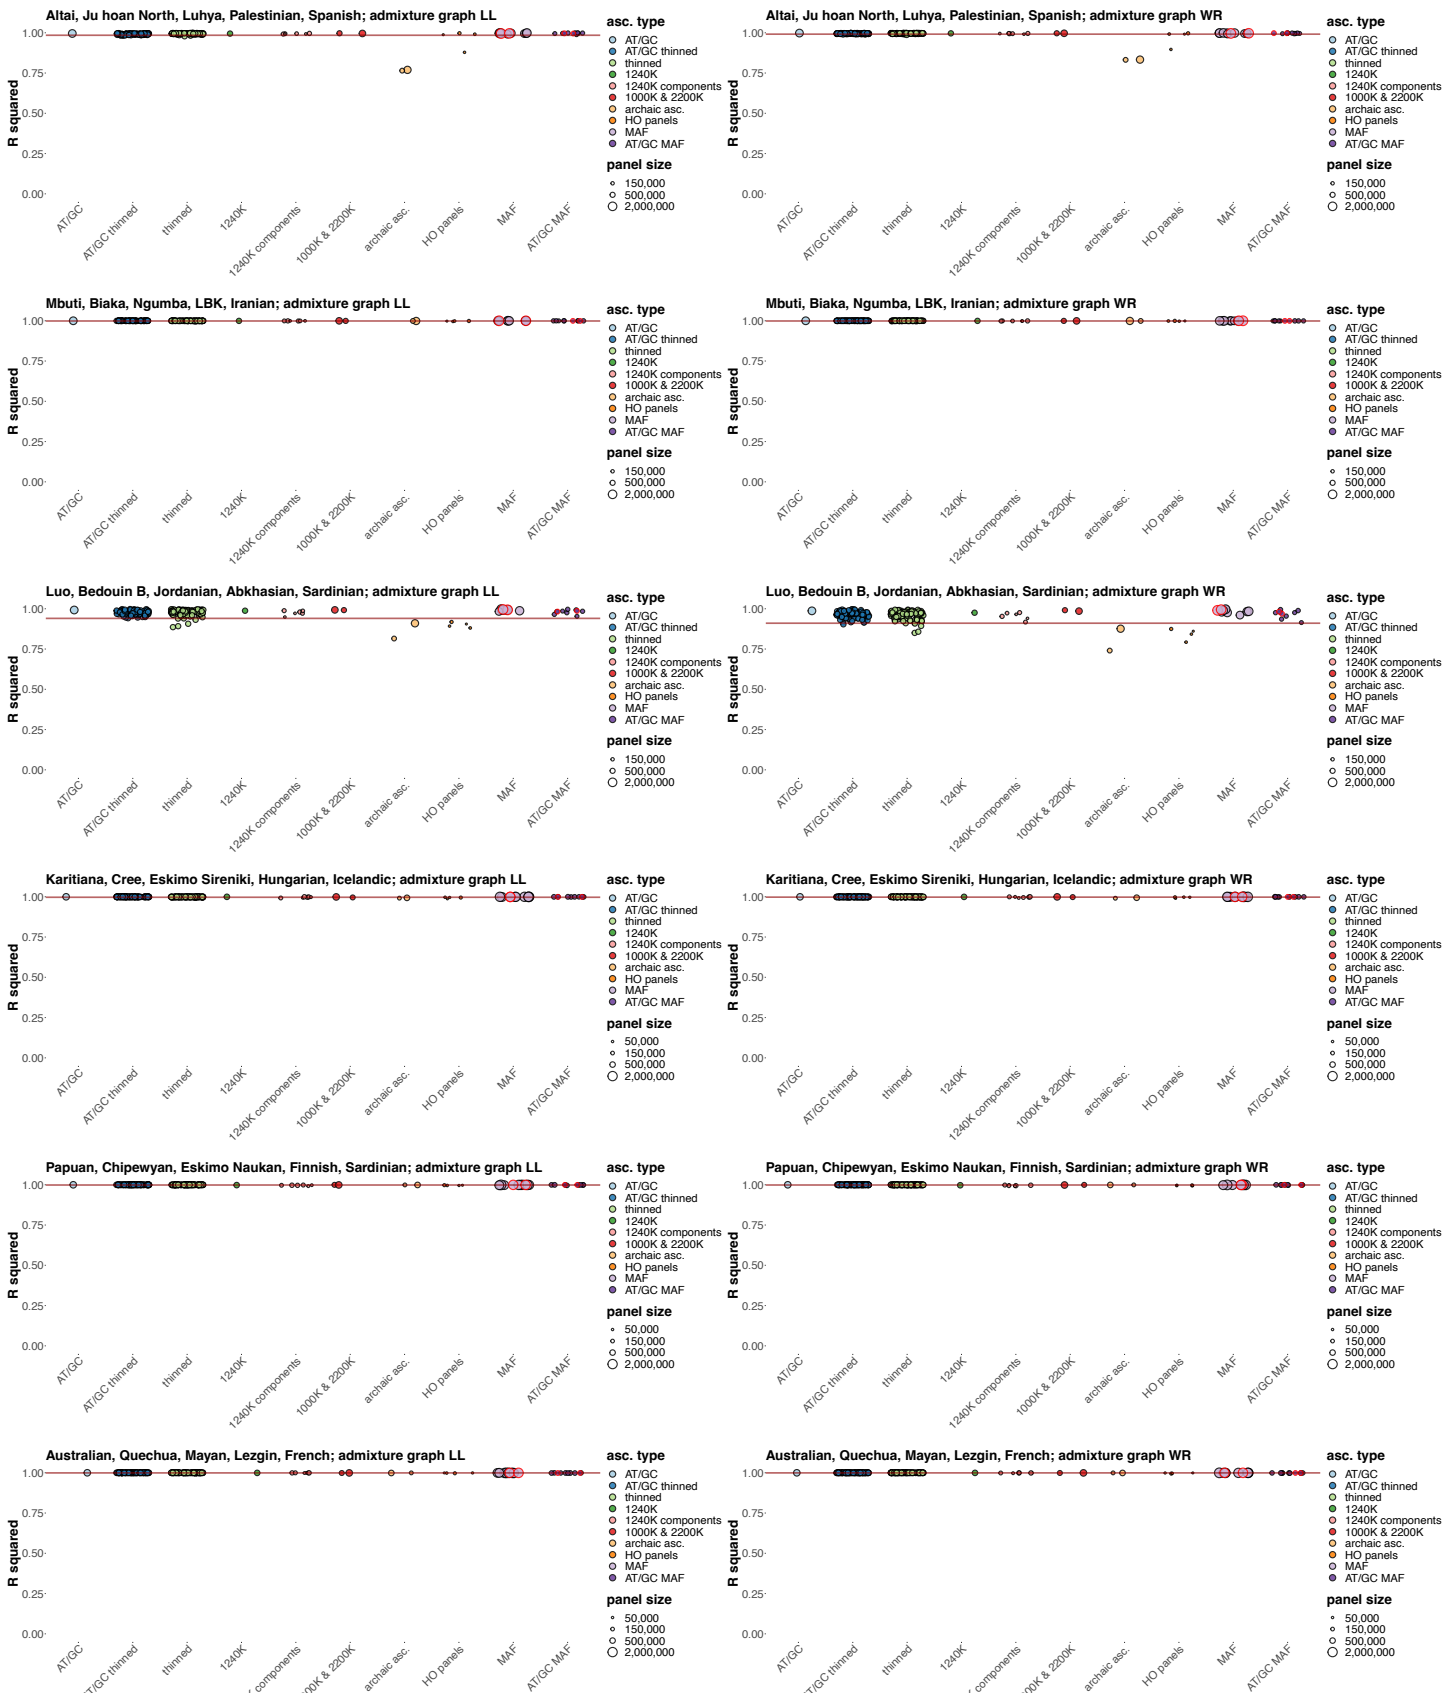

Supplement: pgen.1010931.s003.pdf [file pgen.1010931.s003.pdf]
