# Supplementary material for: Modeling of African population history using f-statistics is biased when applying all previously proposed SNP ascertainment schemes
Source: PubMed Central journal article supplement (PMC10508636; doi:10.1371/journal.pgen.1010931), 2023-09-07

**a**

1240K sites, WR = 2.7, LL = 33.6

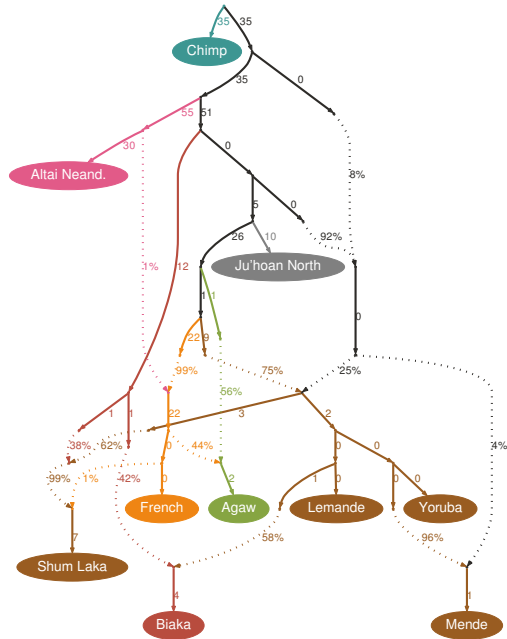

AT/GC sites, WR = 4.8, LL = 61.2

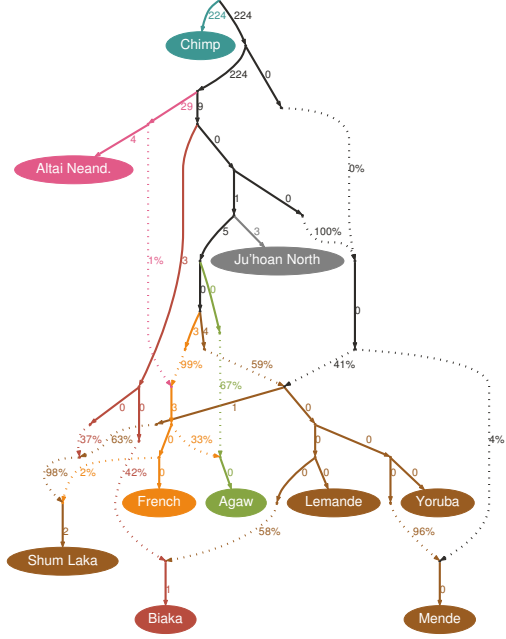

all sites, WR = 8.4, LL = 156.2

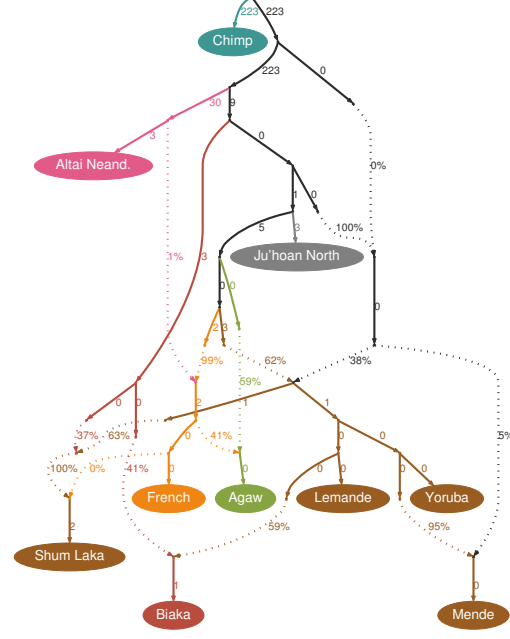**b**

1240K, 839K sites

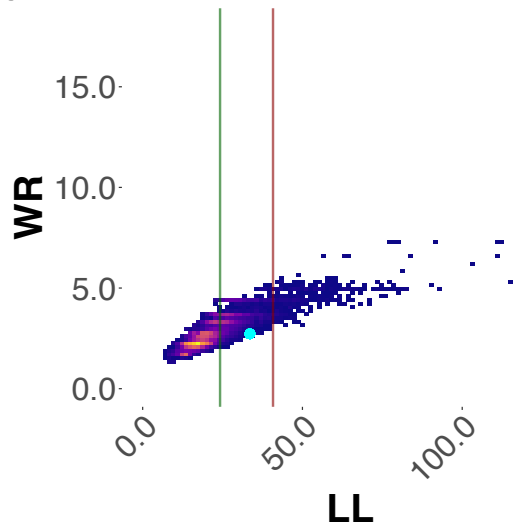

AT/GC sites, 3.8M

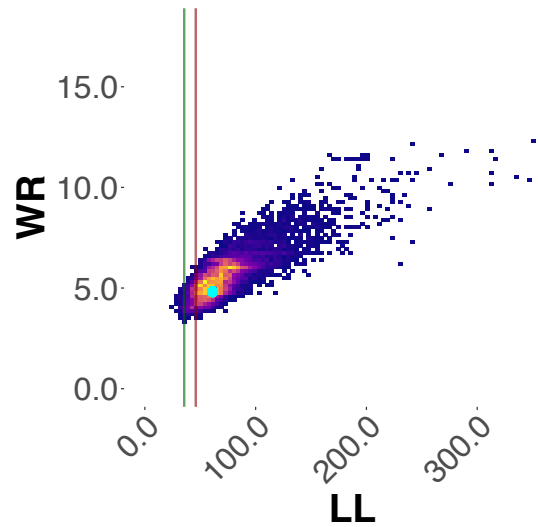

all sites, 25M

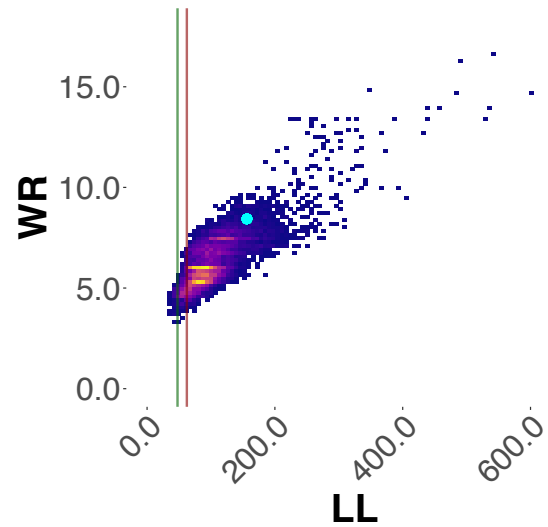**c**

1240K sites, WR = 1.5, LL = 7.2

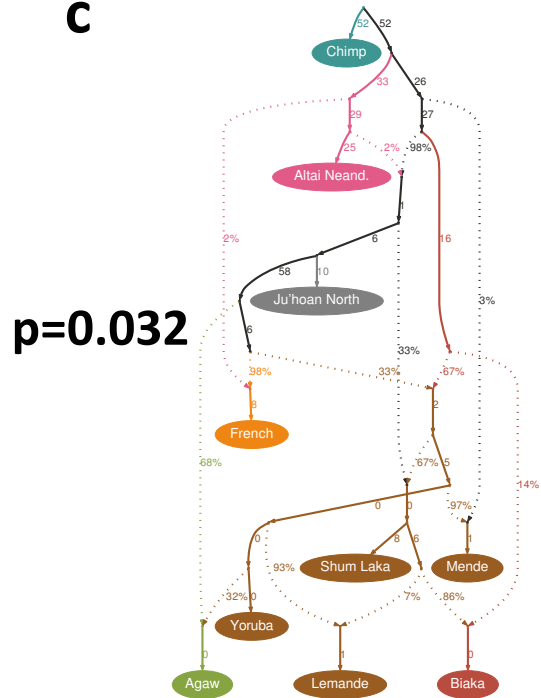

AT/GC sites, WR = 4.1, LL = 24.5

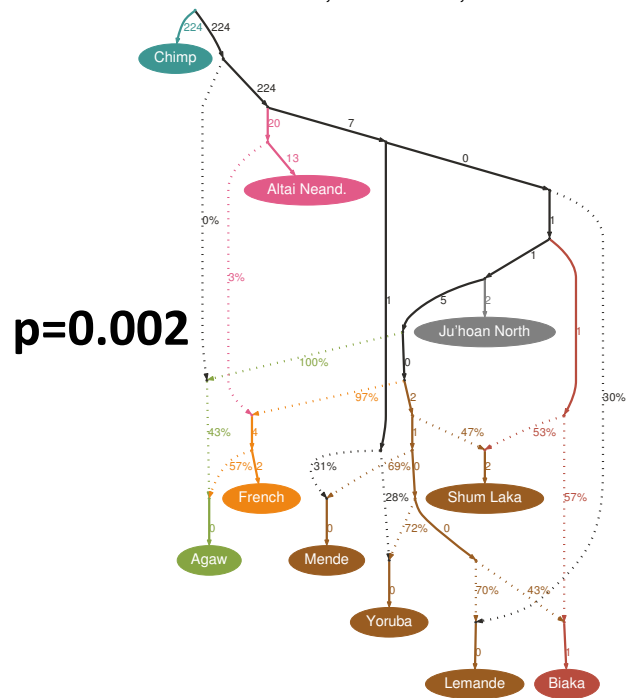

all sites, WR = 3.6, LL = 34.8

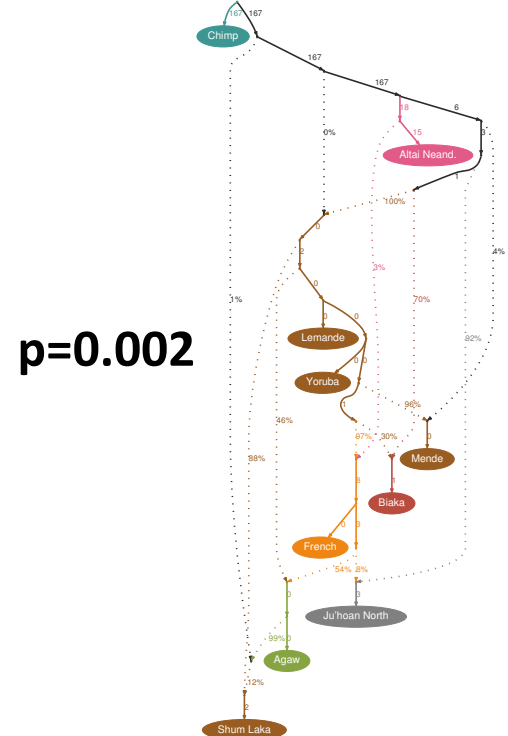

Supplement: pgen.1010931.s004.pdf [file pgen.1010931.s004.pdf]
