# Supplementary material for: Modeling of African population history using f-statistics is biased when applying all previously proposed SNP ascertainment schemes
Source: PubMed Central journal article supplement (PMC10508636; doi:10.1371/journal.pgen.1010931), 2023-09-07
Supplement: pgen.1010931.s008.pdf [file pgen.1010931.s008.pdf]

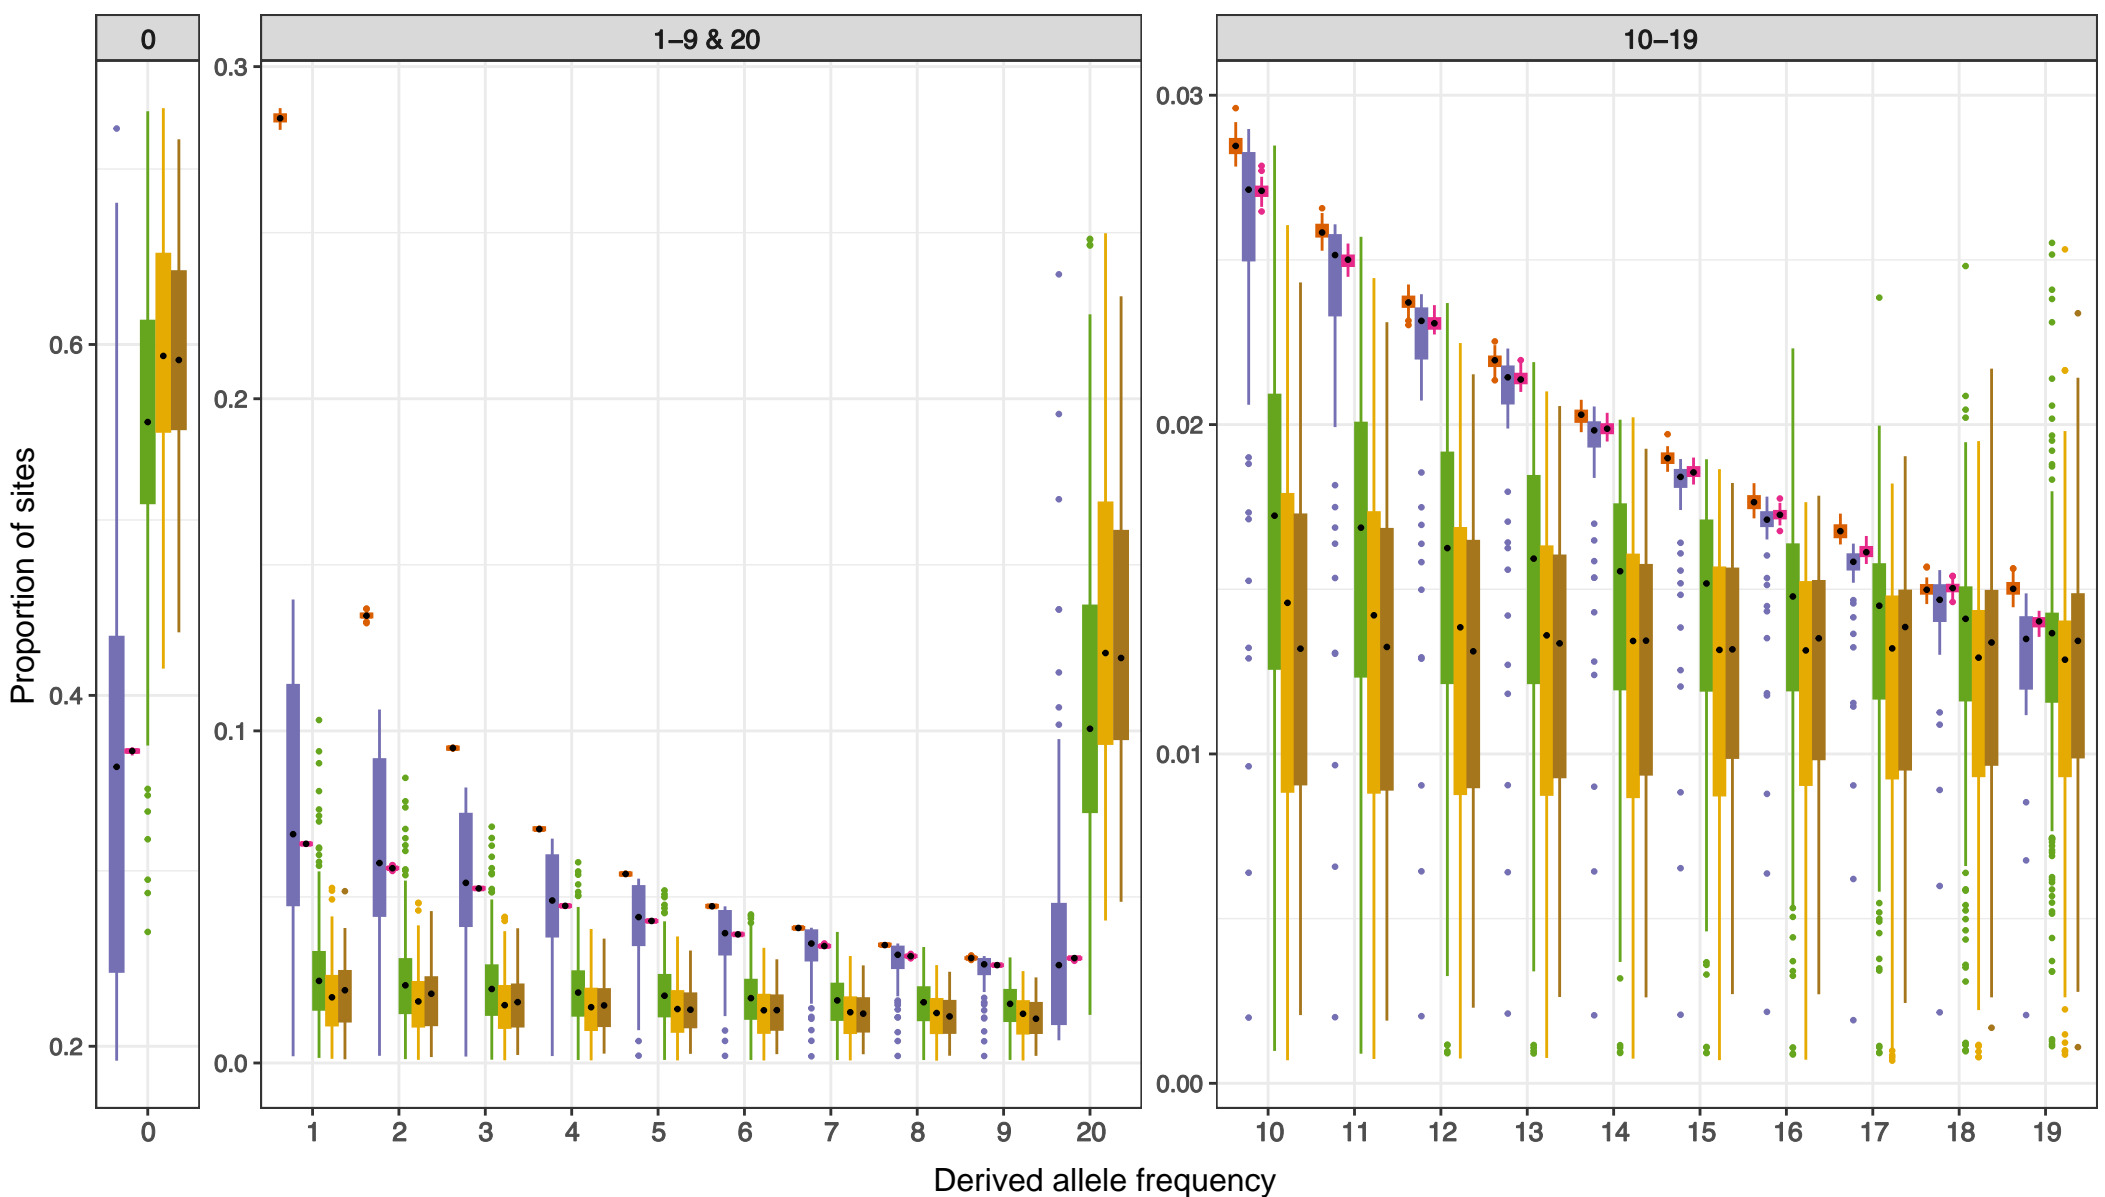

population used for HO one-panel ascertainment,  
with non-OG groups stratified by WR of the true graph

true root

non-OG root

OG

0-4 (non-OG leaves)

4-10 (non-OG leaves)

10-100 (non-OG leaves)
