# Supplementary material for: Modeling of African population history using f-statistics is biased when applying all previously proposed SNP ascertainment schemes
Source: PubMed Central journal article supplement (PMC10508636; doi:10.1371/journal.pgen.1010931), 2023-09-07

94,297 stat.  $f_4(\text{AFRx}, \text{ARCH}; \text{AFRy}, \text{non-AFR})$

1240K

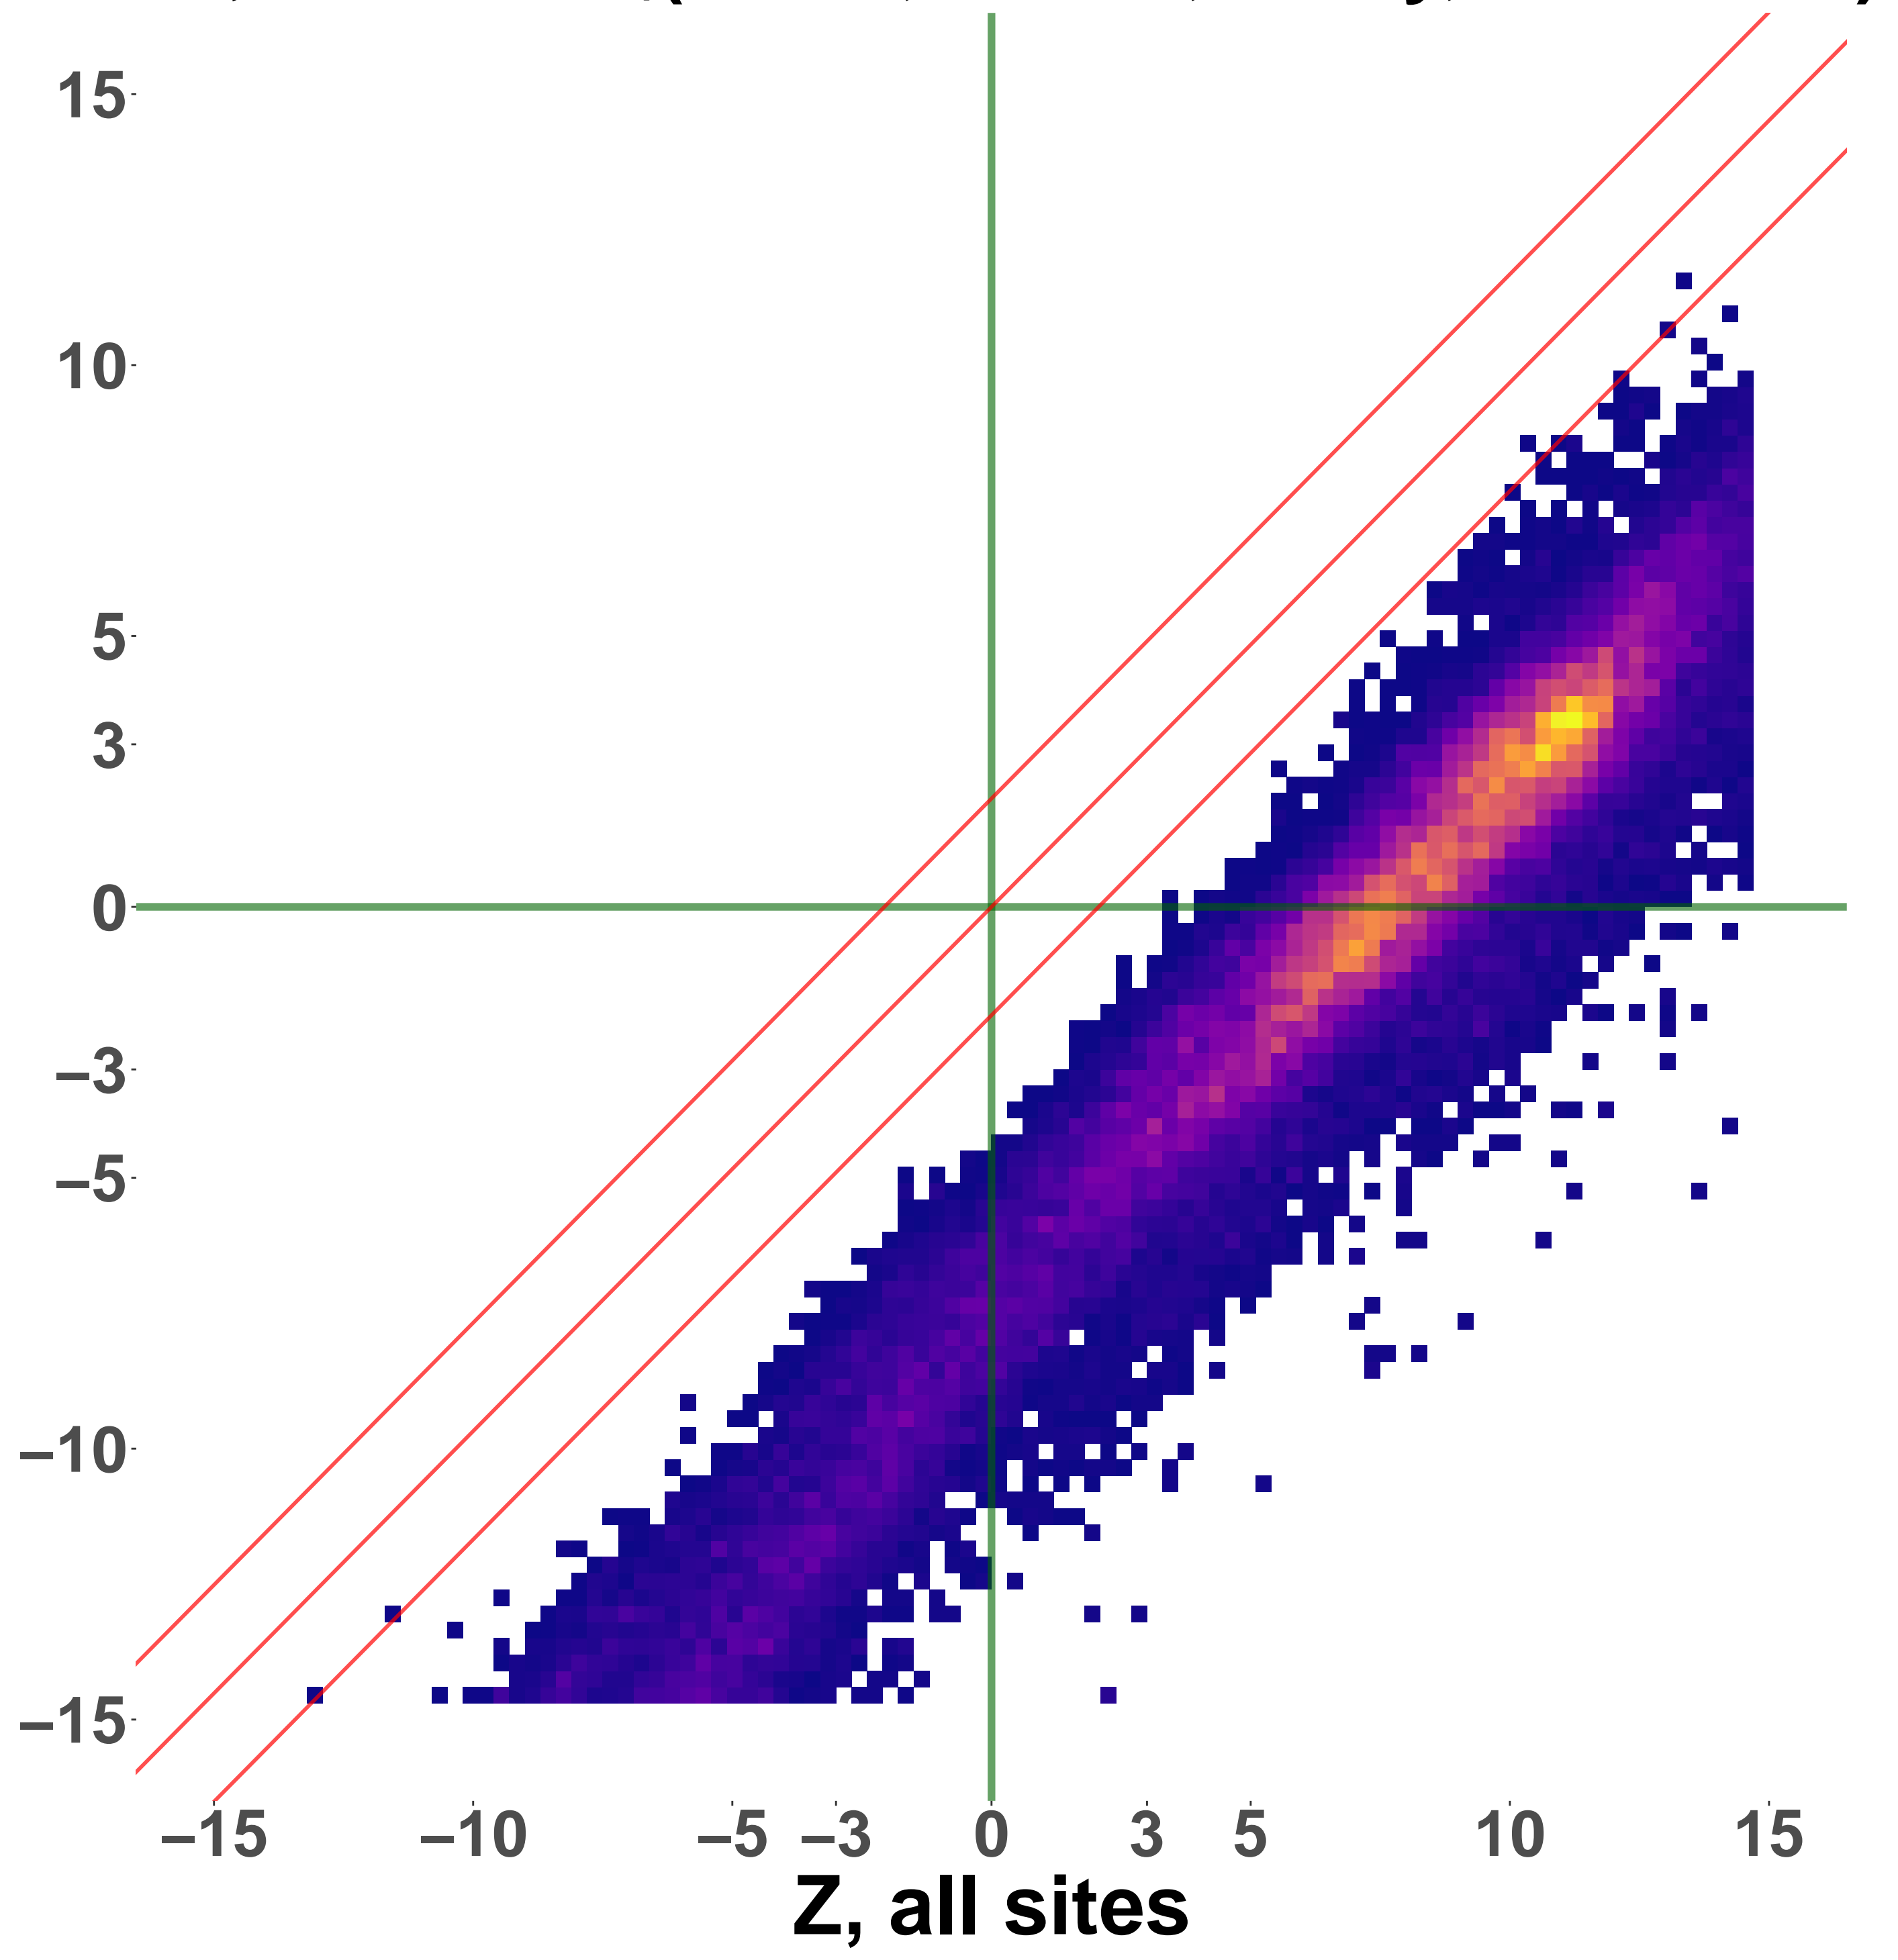

Supplement: pgen.1010931.s014.pdf [file pgen.1010931.s014.pdf]
