# Supplementary material for: Modeling of African population history using f-statistics is biased when applying all previously proposed SNP ascertainment schemes
Source: PubMed Central journal article supplement (PMC10508636; doi:10.1371/journal.pgen.1010931), 2023-09-07
Supplement: pgen.1010931.s030.pdf [file pgen.1010931.s030.pdf]

S13 Table

| Simulated topology                                                     | Population name or event name                                          | Effective population size, diploid individuals | Sampling date, generations | Event date, generations |
|------------------------------------------------------------------------|------------------------------------------------------------------------|------------------------------------------------|----------------------------|-------------------------|
| 16b Fig                                                                | Chimpanzee                                                             | 1,000                                          | 0                          |                         |
|                                                                        | Denisovan                                                              | 3,000                                          | 2,000                      |                         |
|                                                                        | Neanderthal                                                            | 3,000                                          | 2,000                      |                         |
|                                                                        | African 1                                                              | 22,500                                         | 0                          |                         |
|                                                                        | African 2                                                              | 22,500                                         | 0                          |                         |
|                                                                        | African 3                                                              | 22,500                                         | 0                          |                         |
|                                                                        | African 4                                                              | 22,500                                         | 0                          |                         |
|                                                                        | African 5                                                              | 22,500                                         | 0                          |                         |
|                                                                        | Non-African 1                                                          | 5,000                                          | 0                          |                         |
|                                                                        | Non-African 2                                                          | 5,000                                          | 0                          |                         |
| Non-African 3                                                          | 5,000                                                                  | 0                                              |                            |                         |
| Fig 3a                                                                 | a0 (ancestor of a2 + na1 + na2)                                        | 16,914                                         | N/A                        |                         |
|                                                                        | African 1 (a1)                                                         | 44,541                                         | 0                          |                         |
|                                                                        | African 2 (a2)                                                         | 46,139                                         | 0                          |                         |
|                                                                        | eff. pop. size after the out-of-Africa bottleneck                      | 1,506                                          | N/A                        |                         |
|                                                                        | Denisovan (d)                                                          | 16,758                                         | 1,700                      |                         |
|                                                                        | Neanderthal 1 (n1)                                                     | 14,399                                         | 3,790                      |                         |
|                                                                        | Neanderthal 2 (n2)                                                     | 14,399                                         | 1,700                      |                         |
|                                                                        | AMH (a1 + a2 + na1 + na2)                                              | 222,379                                        | N/A                        |                         |
|                                                                        | ancestral Neanderthal population                                       | 8,145                                          | N/A                        |                         |
|                                                                        | ancestral non-African population (na1 + na2)                           | 8,821                                          | N/A                        |                         |
|                                                                        | non-African 1 (na1)                                                    | 35,744                                         | 0                          |                         |
|                                                                        | non-African 2 (na2)                                                    | 14,763                                         | 0                          |                         |
|                                                                        | Neanderthal + AMH ancestral population                                 | 86,161                                         | N/A                        |                         |
|                                                                        | super-archaic population                                               | 35,414                                         | N/A                        |                         |
|                                                                        | chimpanzee (outgroup)                                                  | 1,000                                          | N/A                        |                         |
|                                                                        | root population (chimpanzee + archaic + AMH)                           | 13,858                                         | N/A                        |                         |
|                                                                        | chimpanzee divergence                                                  |                                                |                            | 240,000                 |
|                                                                        | divergence of the ghost population contributing 19% of ancestry in AMH |                                                |                            | 34,740                  |
|                                                                        | gene flow from the ghost lineage to AMH                                |                                                |                            | 11,661                  |
|                                                                        | divergence of the deeper source of Denisovan ancestry                  |                                                |                            | 29,215                  |
|                                                                        | divergence of the Neanderthal lineage (n1+n2)                          |                                                |                            | 20,255                  |
|                                                                        | divergence of the ghost Neanderthal lineage admixing into Denisovans   |                                                |                            | 15,946                  |
|                                                                        | gene flow from the ghost Neanderthal lineage to Denisovans             |                                                |                            | 7,311                   |
|                                                                        | divergence of the ghost AMH lineage admixing into non-Africans         |                                                |                            | 14,184                  |
|                                                                        | African 1 (a1) divergence                                              |                                                |                            | 6,314                   |
|                                                                        | divergence of the Neanderthal 1 (n1) and Neanderthal 2 (n2) lineages   |                                                |                            | 4,013                   |
|                                                                        | African 2 (a2) divergence                                              |                                                |                            | 3,395                   |
|                                                                        | out-of-Africa bottleneck                                               |                                                |                            | 2,931                   |
|                                                                        | gene flow from the Neanderthal 2 (n2) lineage to the AMH ghost lineage |                                                |                            | 2,820                   |
| gene flow from the AMH ghost lineage to non-Africans                   |                                                                        |                                                | 2,544                      |                         |
| divergence of the non-African 1 (na1) and non-African 2 (na2) lineages |                                                                        |                                                | 1,976                      |                         |
